# Supplementary material
Source: PubMed Central journal article supplement (PMC2692874)
Supplement: NIHMS79478-supplement-supp_figs_1_2.pdf [file NIHMS79478-supplement-supp_figs_1_2.pdf]

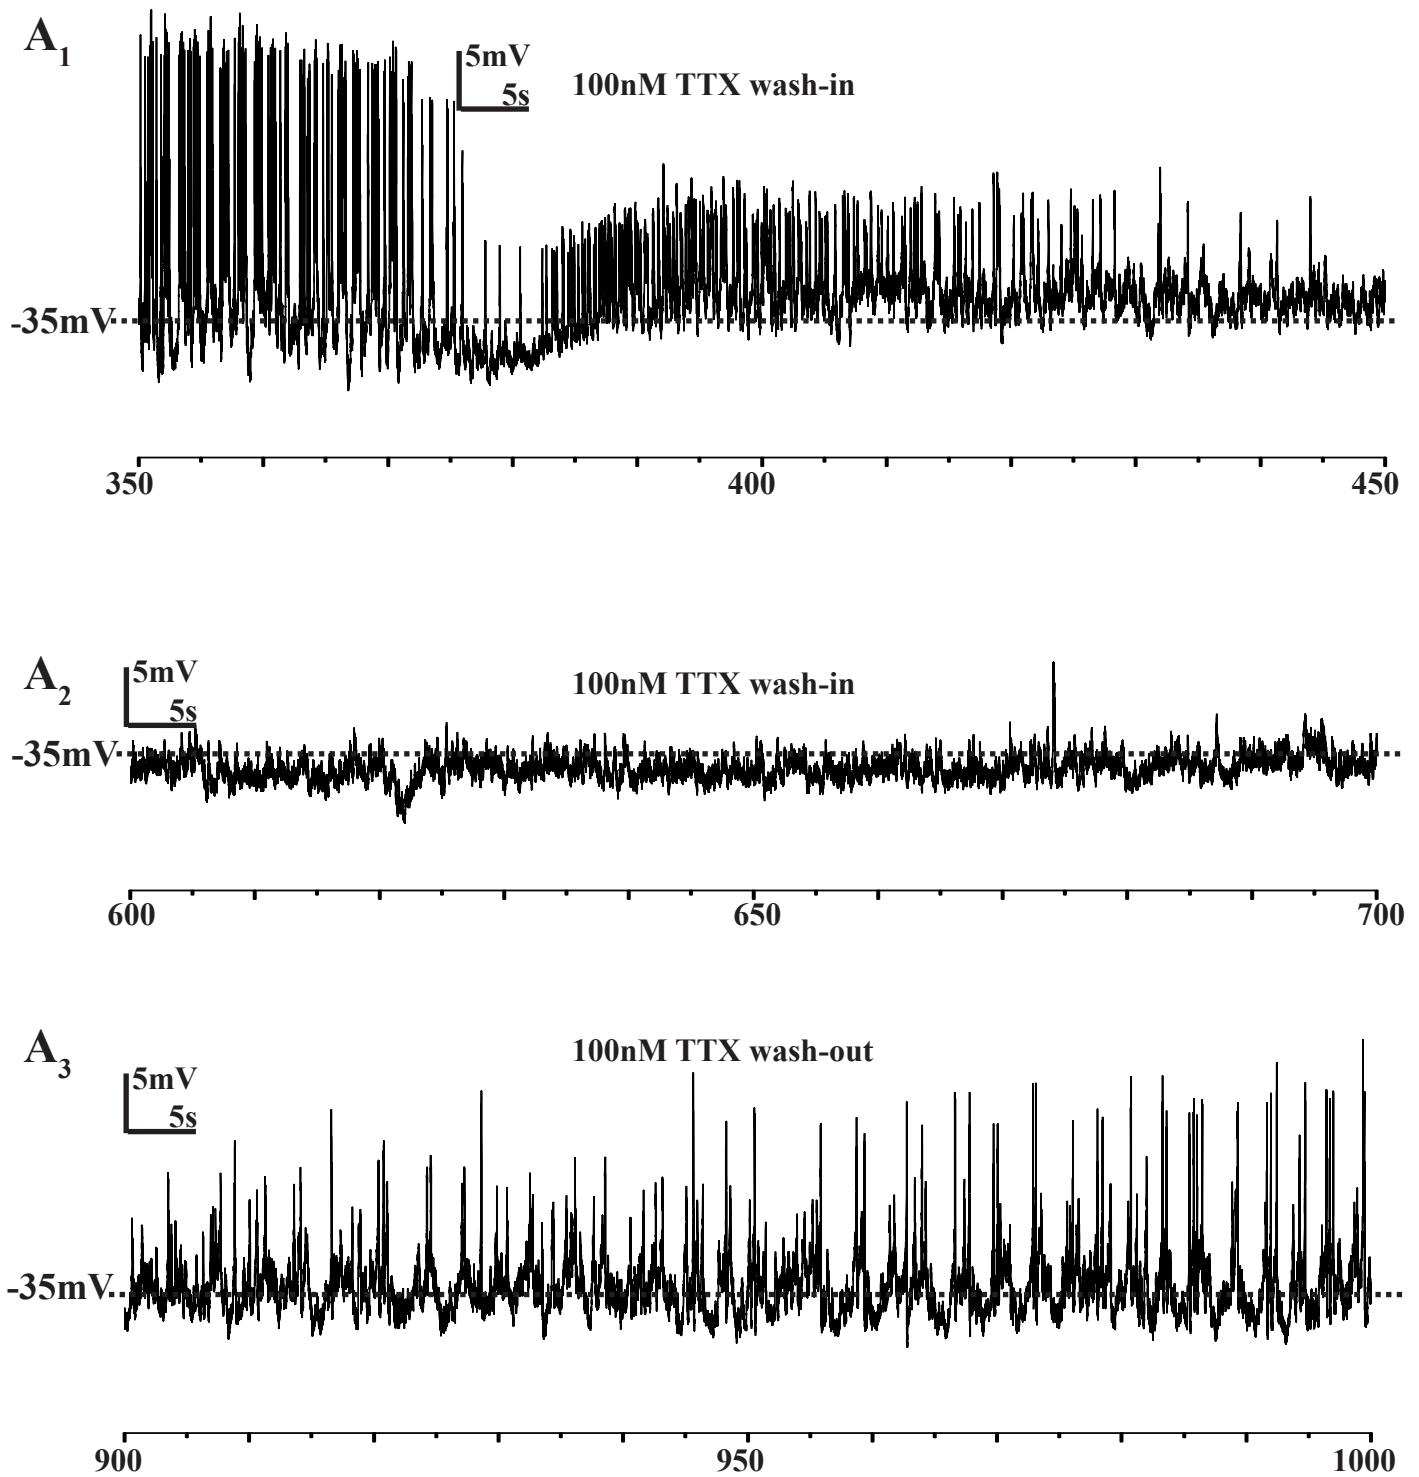

**Supplementary Fig. 1.** (A<sub>1-3</sub>) Long duration record of representative large LNV showing wash-in and wash-out of 100nM TTX. (A<sub>1</sub>) During TTX wash-in, the burst firing cell with large action potential spikes shows diminished amplitude in spikes followed by silencing of cell. (A<sub>2</sub>) No change in membrane potential during TTX application. Smaller amplitude slightly higher frequency oscillations in membrane potential persist during TTX application. (A<sub>3</sub>) Upon wash-out, the membrane potential oscillation and spiking re-appear.

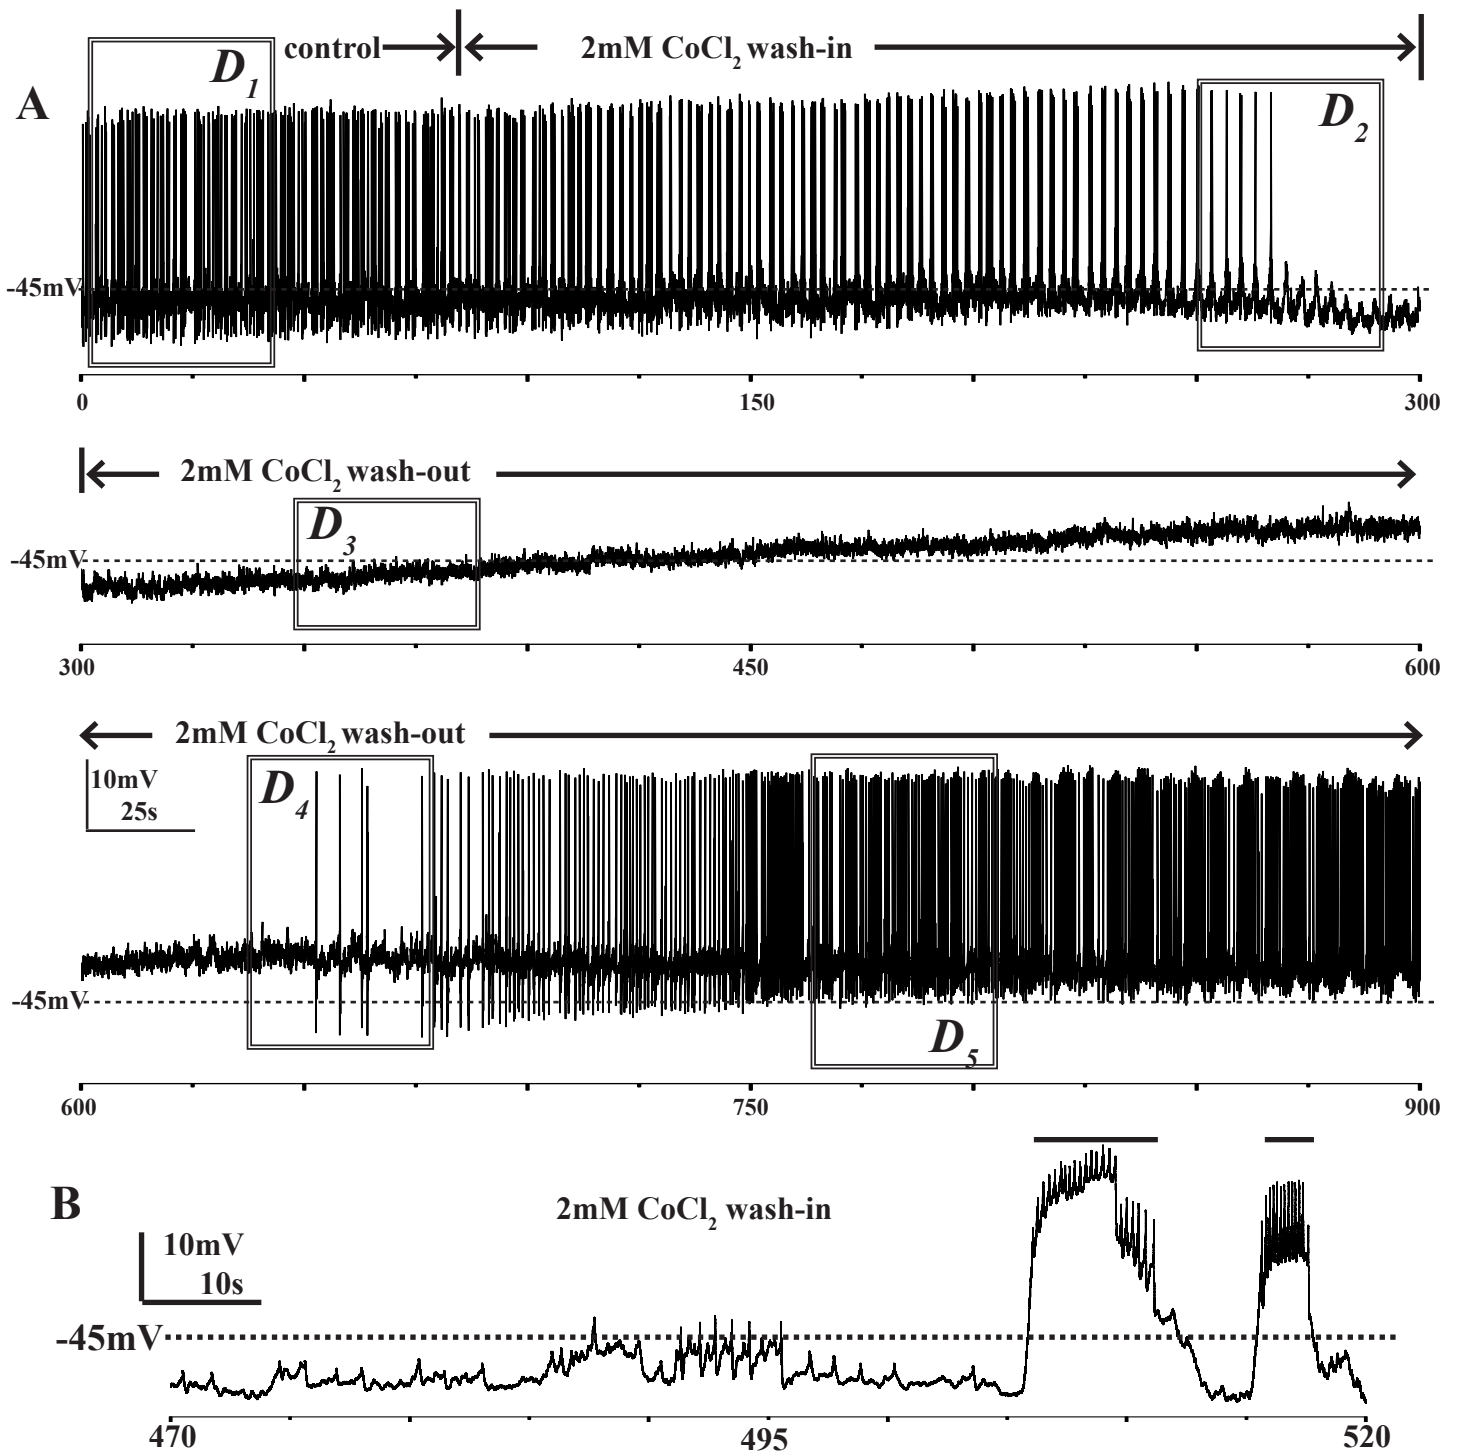

**Supplementary Fig. 2.** (A) Representative whole cell current clamp long duration recording of one large LNV at 0 pA holding current during wash-in and wash-out of 2 mM CoCl<sub>2</sub> shows state modulation of a bursting cell becoming tonic and then silent with 2 mM CoCl<sub>2</sub> wash-in followed by wash-out recovery to tonic and then burst-firing pattern (x-axis shows time in seconds,  $n = 6$ ). Details of this trace at 5 stages (of 20 sec duration) indicated by the boxes  $D_1$ - $D_5$  are shown in Fig. 2  $D_{(1-5)}$ . (B) 2mM CoCl<sub>2</sub> application in another cell causes hyperpolarization in addition to loss of membrane potential oscillation and spontaneous action potential firing, however evoked firing can be induced by depolarizing current injection (horizontal bars).
